1 **Yeast biopanning for detecting antibody binding to site-specific**  
2 **phosphorylations in tau**

3

4 Monika Arbaciauskaite<sup>1</sup>, Azady Pirhanov<sup>2</sup>, Yu Lei<sup>1,2</sup>, and Yong Ku Cho<sup>1,2,3\*</sup>

5

6 <sup>1</sup>Department of Chemical and Biomolecular Engineering, University of Connecticut, Storrs, CT, USA

7 <sup>2</sup>Department of Biomedical Engineering, University of Connecticut, Storrs, CT, USA

8 <sup>3</sup>Institute for Systems Genomics, University of Connecticut, Storrs, CT, USA

9

10 \*To whom correspondence should be addressed: Yong Ku Cho: Department of Chemical and  
11 Biomolecular Engineering, Institute for Systems Genomics, University of Connecticut, Storrs CT 06269;  
12 [cho@uconn.edu](mailto:cho@uconn.edu); Tel. (860) 486-4072; Fax. (860) 486-2959.

13

14 Running title: Yeast biopanning against phospho-tau

15

16 Grant numbers:

17 NSF 1706743

18 NIH 1R21NS111358-01A1

19 Alzheimer's Association 2019-AARG-NFT-640971

20

21

## 22 ***Abstract***

23           The detection of phosphorylated tau (p-tau) levels in clinical samples is of extreme importance  
24 for the detection of Alzheimer’s Disease (AD) as well as other neurodegenerative diseases. Recent reports  
25 show that detecting low levels of p-tau in plasma can be used as a reliable biomarker for detecting AD  
26 prior to the onset of memory loss. The ability to detect such low levels of p-tau is dependent on antibodies  
27 specific to the post translationally modified protein. However, the need for reliable phospho-site specific  
28 antibodies persists due to a lack of approaches for identifying monoclonal antibodies and characterizing  
29 non-specific binding. Here, we report a novel approach using the principles of yeast biopanning to create  
30 a robust platform that uses synthetic peptides as target antigens. Using peptides as antigens enables  
31 screening antibodies against defined post-translational modification sites, particularly for targeting  
32 intrinsically disordered proteins such as the human tau protein. To readily assess yeast binding and  
33 distinguish non-specific binding, we developed bi-directional expression vectors that allow antibody  
34 fragment surface display and intracellular fluorescent protein expression. We show that our platform can  
35 specifically and robustly detect a specific site within the p-tau target peptide when compared against non-  
36 phosphorylated controls. By improving biopanning parameters, we enabled phospho-specific capture of  
37 yeast cells displaying single-chain variable region fragments (scFvs) against p-tau with a wide range of  
38 affinities ( $K_D = 0.2$  to 60 nM). These results demonstrate that yeast biopanning can robustly capture yeast  
39 cells based on phospho-site specific antibody binding, opening doors for facile identification of high-  
40 quality monoclonal antibodies.

41

42 **Key words:** Tau, phospho-tau, post-translational modification, biopanning, antibody binding, yeast  
43 surface display

44

45

## 46 ***Introduction***

47 Reversible protein phosphorylation plays a central role in how cells adapt to the environment,  
48 differentiate, and coordinate. Protein phosphorylation enables regulations at timescales much faster than  
49 gene expression, by inducing conformational changes that alter enzymatic activity, allosteric regulation,  
50 or protein-protein interactions (Graves & Krebs, 1999; Johnson & Lewis, 2001; Pawson, 2004).  
51 Abnormal phosphorylation is associated with many human diseases and is a source of toxicity in  
52 pathogens (Cohen, 2001). Phosphorylation patterns of the microtubule-associated protein tau is a  
53 prominent example, for which association with neurodegenerative diseases has been extensively  
54 documented. In tau, increased phosphorylation at specific sites shows strong correlations with disease  
55 stage (Wesseling et al., 2020) and progression rate (Dujardin et al., 2020). Moreover, elevation in plasma  
56 concentration of tau phosphorylated at threonine 181 or 231 (T181 or T231) is a strong biomarker of AD  
57 (Arbaciauskaite et al., 2021; Ashton et al., 2021; Janelidze et al., 2020; Thijssen et al., 2020). Therefore,  
58 there is a great deal of interest in accurate detection of site-specific protein phosphorylation.

59 Antibodies are widely used for detecting protein phosphorylation, but validation of their binding  
60 specificity remains a major challenge. High specificity phospho-site antibodies tend to interact with one  
61 or more phosphate groups on the modified residue and additional nearby epitopes to achieve site-  
62 specificity (Arbaciauskaite et al., 2021). Unfortunately, many existing phospho-site antibodies suffer from  
63 poor specificity, often showing cross-binding to non-phosphorylated target sites or other phosphorylation  
64 sites (Ercan et al., 2017; D. Li & Cho, 2020). Moreover, most available preparations are rabbit polyclonal,  
65 primarily because rabbits are highly immunogenic to small molecules and haptens unlike rodents (Y. Li et  
66 al., 2000; Liu et al., 2016; Weber et al., 2017). According to a curated antibody database (Labome), 93 %  
67 (15,234 out of 16,371) of existing phospho-site antibodies are rabbit immunoglobulins, and 89 % are  
68 polyclonal. Immunization with synthetic peptides that contain site-specific phosphorylations lead to  
69 reagents with broad applicability, but lack of monoclonal antibodies critically limits validation and  
70 reproducible detection of protein phosphorylation.

71 To address this challenge, we sought to develop a method for screening and characterizing  
72 antibody clones based on specific binding to phosphorylated target protein sites. Considering the  
73 challenge in finding high specificity clones, we aimed to achieve quantitative discrimination based on  
74 binding specificity. Here we report the implementation of yeast display biopanning with whole-well cell  
75 counting to measure phospho-site specific binding to the clinically relevant tau phosphorylation site  
76 T231. Based on the previous finding that yeast cells displaying an anti-fluorescein scFv can adhere to a  
77 monolayer of cultured mammalian cells chemically modified with fluorescein (Wang & Shusta, 2005),  
78 we predicted that yeast cells displaying phospho-specific scFvs can be biopanned. We show that synthetic  
79 phospho-peptides can be immobilized on a layer of human embryonic kidney (HEK) 293 cells and allow  
80 yeast biopanning based on specific antigen-scFv interaction. A bi-directional expression plasmid was  
81 introduced to enable scFv surface display and intracellular expression of fluorescent proteins in yeast.  
82 This allowed rapid cell counting using automated microscopy and the addition of in-well control yeast for  
83 detecting non-specific binding. We report improved peptide immobilization and biopanning conditions  
84 that allow phospho-specific capture of yeast displaying scFvs with a moderate affinity ( $K_d$  of 60 nM),  
85 well within the affinity level of antibodies identified from naïve libraries through yeast biopanning (Wang  
86 et al., 2007). The results clearly show that yeast biopanning can identify phospho-site specific antibodies  
87 and demonstrate the potential for clonal selection of phospho-site binders.

88

## 89 ***Methods***

### 90 ***Bi-directional Expression for Yeast Surface Display of Antibody Fragments and Intracellular*** 91 ***Production of Fluorescent Proteins***

92 For bi-directional expression in yeast, plasmid vector pBEVY-GT (Addgene,  
93 RRID:Addgene\_51231) containing the GAL1-10 promoter with two distinct terminators was used. Yeast  
94 enhanced green fluorescent protein (hereafter referred to as GFP) (Huang & Shusta, 2005) was cloned  
95 into the vector pBEVY-GT between restriction sites BamHI and PstI. pT231 tau scFvs variants (pT231

96 scFv, pT231 scFv mutants 3.24, or Y25A (D. Li et al., 2018)) were cloned into the vector pBEVY-GT  
97 between restriction sites XmaI and EcoRI, resulting in pBEVY-pT231 scFv (or other mutants)-GFP. To  
98 generate yeast expressing a control scFv, the anti-fluorescein scFv 4420 (a gift from Dr. Eric Shusta)  
99 (Boder & Wittrup, 1997) was inserted to pBEVY-GT using restriction sites XmaI and NheI. The scFv  
100 constructs contain a FLAG tag (DYKDDDDK) to its N-terminus (FLAG tag-scFv-Aga2p) to detect full-  
101 length scFv expression. To distinguish the control yeast, Golden gate assembly was used to insert a yeast  
102 codon mCherry (version 4) (Qian et al., 2012) into the vector pBEVY-GT, resulting in pBEVY-4420-  
103 mCherry.

104 Plasmid pAP208 was cloned for surface display of scFvs fused to GFP (FLAG tag-scFv-Aga2p-  
105 GFP). The Aga2p and secretion signal sequence were digested with restriction enzymes NheI and BsaI  
106 and the GFP sequence was digested with restriction enzymes BsaI and XhoI. The sequences were then  
107 cloned into the pCT-4RE backbone between restriction sites NheI and XhoI. All restriction endonucleases  
108 were purchased from New England BioLabs.

109 Resulting plasmid constructs were transformed into *S. cerevisiae* strain EBY100 (ATCC MYA-  
110 4941) (Boder & Wittrup, 1997) using frozen-EZ yeast transformation II kit (Zymo Research, Cat. No.  
111 T2001) and grown on SD-CAA agar plates for 3 to 4 days. From the plates, single colonies were picked  
112 and grown in 3 mL of SD-CAA medium at 30 °C with shaking at 250 rpm overnight. The cell  
113 concentration was then determined by measuring the optical density at 600 nm (OD<sub>600</sub>) and 10<sup>7</sup> yeast cells  
114 were resuspended in 3 mL of SG-CAA medium at 30 °C with shaking at 250 rpm for at least 20 hours to  
115 induce expression of proteins on the surface.

#### 116 ***HEK293FT Cell Culture and Seeding***

117 HEK293FT cells (Invitrogen Cat. No. R70007, RRID:CVCL\_6911) were grown in Dulbecco's  
118 Modified Eagle's Medium (ThermoFisher Cat. No. 12320-032) supplemented with 10 % fetal bovine  
119 serum (Cytiva, head inactivated). The cells were used for less than 15 passages in continuous culture from  
120 cells that were previously frozen at early passage. Wells in a 96-well plate (Thermo Scientific Cat. No.

121 165305) were coated with 50  $\mu$ L of Matrigel (Corning Cat. No. 354234) and the plate was rocked to  
122 ensure even coating. The plate was then incubated at 37  $^{\circ}$ C for at least one hour before cells were added.  
123 HEK293FT cells were seeded in the 96-well plate the day before experiments to reach 100 % confluency.  
124 The next day, the cells were used in the yeast biopanning protocol as described below.

### 125 *Yeast Biopanning against Tau Peptide Ligands*

126 To carry out yeast cell biopanning against peptide ligands, HEK293FT cells are first grown to  
127 100 % confluency in wells within a 96-well plate as described above. These wells were then washed twice  
128 with 100  $\mu$ L of ice-cold PBSCMA (137 mM NaCl, 2.7 mM KCl, 10 mM Na<sub>2</sub>HPO<sub>4</sub>, 1.8 mM KH<sub>2</sub>PO<sub>4</sub>, 1  
129 mM CaCl<sub>2</sub>, 0.5 mM MgCl<sub>2</sub>, and 1 g/L BSA, pH 7.4). Cells were then biotinylated using NHS-PEG<sub>4</sub>-  
130 Biotin (125  $\mu$ M unless otherwise specified, ThermoFisher Cat. No. A39259) diluted in PBSCMA to  
131 achieve a total volume of 50  $\mu$ L per well for 30 minutes at room temperature. After this, wells were  
132 washed again twice with 100  $\mu$ L of ice-cold PBSCMA. To quench the biotinylation reaction, wells were  
133 incubated with 50  $\mu$ L of PBSCM with 0.1 M Glycine for 10 minutes at room temperature. Wells were  
134 washed once with 100  $\mu$ L ice-cold PBSCMA after this.

135 Streptavidin was then added to the cells at 50  $\mu$ L total volume per well diluted in PBSCMA for  
136 30 minutes at room temperature. For initial experiments aiming to visualize the degree of HEK293FT cell  
137 biotinylation, streptavidin conjugated with Alexa Fluor 647 (1:200, 155 nM, Invitrogen Cat. No. S32357)  
138 was used as the streptavidin reagent. For all other experiments, unconjugated streptavidin (1 mg/mL  
139 diluted to 155 nM unless otherwise stated, Sigma Cat. No. 85878) was used. After incubation, wells were  
140 washed twice with 100  $\mu$ L of ice-cold PBSCMA.

141 The wells were then incubated with biotinylated peptide antigens (0.1  $\mu$ M unless otherwise  
142 stated) diluted in PBSCMA to achieve 50  $\mu$ L total volume per well for 30 minutes at room temperature.  
143 The peptides used were previously described biotinylated peptides (D. Li et al., 2018) containing a  
144 sequence found in the tau protein with and without phosphorylated threonine site pT231. The biotinylated  
145 phospho-peptide (KKVAVVR(pT)PPK(pS)PSSAK-biotin) and the non-phospho-peptide

146 (KKVAVVRTPPKSPSSAK-biotin) were synthesized by Peptide 2.0. The phospho-peptide contains two  
147 phosphorylation sites, but the pT231 scFv interact only with the pT231 site (Shih et al., 2012). To test a  
148 range of peptide concentrations, the peptide was prepared to the highest concentration necessary for that  
149 day of experiments and then continuously diluted 2-fold to cover the range of the titration curve. Wells  
150 were then washed twice with 100  $\mu$ L of ice-cold PBSCMA.

151 For experiments using only a single yeast transformant (e.g. yeast transformed with pBEVY-  
152 pT231 scFv 3.24-GFP), the cells were separated out at a concentration of  $10^6$  yeast cells per well. For  
153 experiments using two yeast transformants, namely those expressing pBEVY-4420-mCherry in addition  
154 to yeast cells expressing pBEVY-pT231 scFv 3.24-GFP, cells were mixed in equal amounts to the desired  
155 final concentration. These cells were washed three times with 500  $\mu$ L of ice-cold PBSCMA and  
156 resuspended in PBSCMA at a volume of 50  $\mu$ L per  $10^6$  yeast cells. Yeast cells were then incubated in the  
157 wells for 30 minutes at room temperature. After incubation, wells were washed once with 100  $\mu$ L of ice-  
158 cold PBSCMA.

159 Wells were then washed by dispensing 100  $\mu$ L of ice-cold PBSCMA to one side of a wall (for  
160 example, the east wall side) and aspirating the liquid from the opposite side (the west side). The buffer  
161 was then dispensed to a different wall side (for example, the north wall side) and aspirated from the  
162 opposite side (the south side). This was repeated for a third time with yet again a different combination of  
163 wall sides (for example, northeast to southeast well walls). This whole process was repeated twice again  
164 using different combinations of wall sides, making sure to dispense liquid to walls that were aspirated  
165 from previously. In other words, if the first round of washing included pipetting from the north to the  
166 south side, pipetting from the south to the north side needed to be accounted for. Additionally, we made  
167 sure to include wall sides that were not included initially such as the northwest and southwest sides of the  
168 well walls. At this point, each well should have been washed once plainly and three times with 3 different  
169 combinations of well wall sides. If this protocol is carried out, each well should have been washed

170 (dispensing media and aspirating it) a total of 10 times. After washing, 100  $\mu$ L of ice-cold PBSCMA were  
171 added to the wells and the plate was used for imaging and analysis.

### 172 ***96-well Image Acquisition***

173 The automated microscope Keyence BZ-X810 was used for imaging the wells. For each well, a minimum  
174 of 4 set points were made and focused within the 96-well plate setting in the BZ-X800 Viewer software.  
175 Once the set points were made, the microscope automatically took scanning fluorescence images of the  
176 wells. After the images were acquired, they were analyzed by the BZ-X800 Analyzer software. An  
177 appropriate threshold was determined manually using an image at the edge of a well and this threshold  
178 was applied to all of the images taken during the same day of experiments. All of the images from an  
179 individual well were then loaded into the software along with the threshold image, image stitching was  
180 turned on, and the software counted the individual cells present. The number reported by the software was  
181 used as the “cell count” number in analysis.

### 182 ***Antibody Labeling of Yeast Displayed scFv***

183 To quantify scFv expression,  $2 \times 10^6$  yeast cells displaying scFvs were washed twice with PBSA  
184 (137 mM NaCl, 2.7 mM KCl, 10 mM  $\text{Na}_2\text{HPO}_4$ , 1.8 mM  $\text{KH}_2\text{PO}_4$ , and 1 g/L BSA, pH 7.4) and  
185 resuspended in 100  $\mu$ L PBSA with a chicken anti-FLAG tag antibody (Abnova PAB29056, 1:500  
186 dilution). Cells were incubated with the primary antibody for 30 minutes on ice and washed once with  
187 500  $\mu$ L PBSA. Cells were then stained with either goat anti-chicken IgY Alexa Fluor 647 (ThermoFisher,  
188 Cat. No. A21449, 1:200 dilution) or goat anti-chicken IgY Alexa Fluor 488 (ThermoFisher, Cat. No.  
189 A11039, 1:200 dilution) in 100  $\mu$ L PBSA for 30 minutes on ice. Cells were then washed once with 500  
190  $\mu$ L PBSA and resuspended in 500  $\mu$ L PBSA before detecting fluorescence.

191 To evaluate scFv binding to target peptide ligands,  $2 \times 10^6$  yeast cells were washed twice with  
192 PBSA and incubated with the biotinylated phospho-peptide in PBSA at room temperature for 1 hour. The  
193 volume of PBSA used for incubation varied depending on the concentration of phospho-peptide that was  
194 tested to ensure the peptide to scFv ratio remained constant. After labeling with the peptide, the cells were



195 then stained as described above with streptavidin R-phycoerythrin (ThermoFisher, Cat. No. S866, 1:100  
196 dilution) added with a secondary antibody. Cells were washed and resuspended before detecting  
197 fluorescence.

198 Yeast cell fluorescence was detected using the BD Biosciences LSR Fortessa X-20 flow  
199 cytometer (UConn Center for Open Research Resources and Equipment). ‘scFv expression’ and ‘GFP  
200 expression’ indicate fluorescence values recorded from the flow cytometer for the FLAG tag staining and  
201 GFP fluorescence, respectively. ‘binding/expression’ refers to the fluorescence values from the  
202 biotinylated peptide binding divided by the scFv expression.

### 203 *Statistical Analysis*

204 Prism 8 (GraphPad) was used for statistical analysis. Statistical tests used for each dataset are  
205 described in the figure legends.

206

## 207 **Results**

### 208 ***Development of Yeast Biopanning for a Peptide Antigen***

209 To assess the binding of yeast cells displaying antibody fragments to a peptide antigen target, we  
210 developed a biopanning approach (**Fig. 1**) outlined as follows (**Fig. 1a**). First, wells within a 96-well plate  
211 were coated with Matrigel to allow for the attachment of HEK293FT cells, which were grown to 100 %  
212 confluency. These cells were biotinylated, and then streptavidin was added to the biotinylated HEK293FT  
213 cells. Since four individual biotin molecules can bind to one streptavidin molecule, we anticipated there  
214 would be leftover streptavidin binding sites to capture biotinylated peptides. After biotinylated peptide  
215 was added, yeast cells expressing scFv binders were added.

216 To facilitate the detection of yeast cells, we designed and tested two different plasmid constructs  
217 that allow surface display of scFvs and expression of fluorescent proteins (**Fig. 1b**). Both designs use the  
218 Aga2p system (Boder & Wittrup, 1997) for yeast surface display of scFvs. The first design uses bi-  
219 directional expression based on the pBEVY backbone (Miller et al., 1998) for intracellular expression of  
220 fluorescent proteins (e.g., GFP or mCherry) and surface display of scFvs (**Fig. 1b**). On the other hand, in  
221 the second design (pAP208), GFP was fused to the C-terminus of Aga2p (scFv-Aga2p-GFP), enabling its  
222 expression on the yeast cell surface (**Fig. 1b**). To these constructs we cloned the pT231 tau scFv, which  
223 binds a phosphorylated peptide derived from the human microtubule-associated tau protein (D. Li et al.,  
224 2018) or an anti-fluorescein scFv 4420 (Boder & Wittrup, 1997) as a control. We then compared the  
225 expression levels of both the scFv and GFP using flow cytometry. We found that there were no  
226 significant differences in scFv expression when comparing the two different backbone constructs (**Fig.**  
227 **1c**). However, when comparing GFP expression levels, there were clear significant differences between  
228 the two backbones (**Fig. 1c**). The pBEVY backbone expressed GFP at about 6-7-fold higher levels than  
229 the pAP208 backbone (**Fig. 1c**) and was therefore used for the subsequent biopanning experiments.

230

231 To quantitatively assess binding, we performed biopanning using yeast cells displaying the high  
232 affinity pT231 scFv mutant (pT231 scFv 3.24) in 96-well plates as described in **Fig. 1a**, but with or  
233 without the biotinylated phosphorylated tau (p-tau) peptide. After the addition of these yeast binders, the  
234 wells were thoroughly washed loosely following the previously described yeast biopanning protocol  
235 (Wang et al., 2007) with some modifications (see Methods). Successful biotinylation of HEK293FT cells  
236 is shown using streptavidin conjugated with Alexa 647 (**Fig. 1d**). We found clear binding of the yeast  
237 cells in wells containing the p-tau peptide, but nearly no binding in wells without the peptide (**Fig. 1d**).

238 To verify that the yeast cells were selectively binding to the p-tau peptide, we repeated the  
239 biopanning experiment with a non-phosphorylated tau peptide in addition to the no peptide control. To  
240 comprehensively assess the binding, we used an automated microscope (Keyence BZ-X810) that takes  
241 fluorescence images of the entire well and quantified the amount of yeast cells present in each well after  
242 washing. These experiments were repeated across three different days with triplicates each day. When  
243 analyzing the number of yeast cells in each well, it is clear that they specifically bind to the intended p-tau  
244 peptide (**Fig. 2b**). We attribute the relatively small number of cells present in wells with no peptide or  
245 non-phosphorylated peptide to the inability to wash out non-binding cells completely.

#### 246 ***Biopanning Using an Internal Control Yeast Strain***

247 After observing non-specific signal present in wells with non-phosphorylated peptide and no  
248 peptide, we wanted to introduce a more reliable method of capturing non-specific signal. To do this, we  
249 designed a second strain of yeast cells that could be used as an internal control for the biopanning  
250 experiments (**Fig. 3a**). This control yeast strain expresses mCherry instead of GFP and the anti-  
251 fluorescein scFv using the pBEVY plasmid backbone. Using yeast cells expressing this plasmid (pBEVY-  
252 4420-mCherry) in conjunction with yeast cells expressing the plasmid described above (pBEVY-pT231  
253 scFv 3.24-GFP) endowed us with the ability to quantify the non-specific signal within each well. The  
254 experimental set-up again included wells with p-tau peptide and controls (**Fig. 3b**). Yeast cells expressing  
255 pBEVY-4420-mCherry and yeast cells expressing pBEVY-pT231 scFv 3.24-GFP were mixed in equal

256 numbers and added to the wells (**Fig. 3b**). After washing, the wells were imaged and the number of yeast  
257 cells in each well was quantified.

258 To evaluate if the total number of yeast cells in each well affects the degree of non-specific  
259 binding, we tested different cell densities in the biopanning experiment. For each cell density condition  
260 tested, the yeast cells expressing the two different plasmid constructs were mixed in equal proportion.  
261 After washing, full-well imaging, and cell counting, the ratio of yeast cells expressing pBEVY-pT231  
262 scFv 3.24-GFP to yeast cells expressing pBEVY-4420-mCherry was determined (**Fig. 3c**). These  
263 experiments showed that this ratio remained relatively consistent for the control wells, indicating that  
264 non-specific binding can be accurately captured by using the internal control yeast strain. Additionally,  
265 we observe that adding an initial total amount of  $0.5 \times 10^6$  yeast yields the best ratio of specific binders to  
266 non-specific binders (**Fig. 3c**). Taken together these results show that, while cell density does not affect  
267 the degree of non-specific binding, it is important to consider when looking to optimize the best specific  
268 to non-specific binder ratio.

### 269 *Improved Biopanning Parameters*

270 To further understand the mechanisms of this approach and to achieve the highest possible  
271 number of binding yeast cells, we aimed to test and optimize three parameters: the concentration of the  
272 biotinylation reagent (NHS-PEG4-Biotin) applied to HEK293FT cells, the concentration of the peptide  
273 antigen, and the concentration of the streptavidin reagent that captures biotinylated peptide (**Fig. 4**).

274 To analyze the effect of the biotinylation reagent, we tested eight different concentrations ranging  
275 from 7.81  $\mu$ M to 1 mM (**Fig. 4a**). For each of these concentrations, cells expressing pBEVY-pT231 scFv  
276 3.24-GFP were added to wells containing p-tau peptide or controls. After washing and well imaging, the  
277 number of cells in each well was determined. Each biotinylation reagent concentration parameter was  
278 tested on three separate days with one sample quantified each day. Statistical testing for the differences  
279 between target peptide and control peptides for each concentration showed that only three biotin

280 concentrations resulted in significantly higher binding compared to the controls (**Fig. 4a**). At biotinylation  
281 reagent concentration of 31.25  $\mu\text{M}$ , there was a significant difference in the cell count of the  
282 phosphorylated target peptide when compared with the non-phosphorylated peptide, but not when  
283 compared with the cell count of wells without peptide (**Fig. 4a**). At 62.5  $\mu\text{M}$ , there was a significant  
284 difference in the cell counts between phosphorylated target peptide and wells containing no peptide, but  
285 not when compared to wells containing non-phosphorylated peptide (**Fig. 4a**). Biotinylation reagent  
286 concentration of 125  $\mu\text{M}$  proved to be the most promising, showing a significant difference in the cell  
287 count of phosphorylated target peptide when compared with both non-phosphorylated peptide and wells  
288 without peptide (**Fig. 4a**). For this reason, this reagent concentration was chosen as the standard in  
289 subsequent biopanning experiments.

290 To test the sensitivity of our platform to the peptide target antigen, we tested a range of p-tau  
291 peptide concentrations between 0.098 nM to 1  $\mu\text{M}$  (**Fig. 4b**). Each peptide concentration was tested on at  
292 least three separate days, with triplicates each day. For analysis of this data, the “signal” (number of yeast  
293 cells expressing pBEVY-pT231 scFv 3.24-GFP still present after washing), was normalized. Normalizing  
294 the data involved subtracting the yeast cell count present in wells without peptide (taken as background)  
295 from the yeast cell count present in wells with target peptide. This number was then normalized to the  
296 highest signal from that day of experiments, which was always at least 0.1  $\mu\text{M}$ . From these experiments,  
297 we saw no detectable signal from peptide concentrations of 0.098 nM to 1.56 nM (**Fig. 4b**). However, we  
298 observed significant binding starting at a peptide concentration of 3.13 nM and apparent signal saturation  
299 beginning at a concentration of 0.1  $\mu\text{M}$  (**Fig. 4b**). From these results, a peptide concentration of 0.1  $\mu\text{M}$   
300 was chosen for the purpose of obtaining the strongest signal possible in subsequent experiments.

301 To further optimize the interactions within this biopanning platform, we tested a range of  
302 streptavidin concentrations between 50 nM to 6.25  $\mu\text{M}$  (**Fig. 4c**). For each concentration, cells expressing  
303 pBEVY-pT231 scFv 3.24-GFP were added to wells containing p-tau peptide and controls. After washing  
304 and full-well imaging, the number of cells in each well was determined and each parameter was tested on

305 three separate days with duplicates each day. Statistical analysis showed that a streptavidin concentration  
306 of 50 nM resulted in no significant difference of cells binding to target peptide versus controls. However,  
307 each of the three higher streptavidin concentrations (250 nM, 1.25  $\mu$ M, 6.25  $\mu$ M) showed a significant  
308 difference when comparing cell count in wells with target peptide versus controls (**Fig. 4c**). Furthermore,  
309 when comparing the cell count of the p-tau peptide across these three streptavidin concentrations,  
310 statistical testing showed no significant differences. For these reasons, a streptavidin concentration of 1.25  
311  $\mu$ M was chosen to ensure there is enough streptavidin present for the capture of biotinylated peptides.

### 312 *Biopanning with a Lower Affinity Variant*

313 Once the most important conditions were optimized, we were interested in testing the  
314 performance of biopanning to detect the binding of lower affinity scFvs (**Fig. 5**). Working towards the  
315 goal of using this platform to screen pools of antibodies, it is highly important to capture cells displaying  
316 antibody fragments with sub-optimal affinities.

317 Because the pT231 scFv 3.24 used ( $K_D = 200$  pM (D. Li et al., 2018)) is a high affinity and  
318 specificity mutant of a previously described antibody (pT231 scFv WT,  $K_D = 2.2$  nM (Shih et al., 2012)),  
319 we first tested this wild-type scFv (**Fig. 5a**). The optimized conditions of biotin (125  $\mu$ M), peptide (0.1  
320  $\mu$ M), and streptavidin (1.25  $\mu$ M) were tested with the wild-type scFv (pBEVY-pT231 scFv-GFP) across  
321 three different days with triplicates each day. After washing steps, the wells were imaged and the number  
322 of cells in each well were counted and analyzed. These experiments showed a significant difference in the  
323 number of cells in p-tau peptide wells when compared to negative controls (**Fig. 5a**).

324 To test even lower affinity antibodies, we turned our attention to a lower affinity mutant (pT231  
325 scFv containing an alanine point mutation Y31A in the CDR we reported previously (D. Li et al., 2018))  
326 of the original wild type. To compare the affinity of this mutant to the wild type, we performed titrations  
327 for yeast cells expressing the wild-type pT231 scFv or the mutant (Y31A) (expressed using the pCT-4RE  
328 plasmids cloned previously (D. Li et al., 2018)) with the p-tau peptide at concentrations ranging from 1.6

329 nM to 1  $\mu$ M (**Fig. 5b**). These experiments showed that the affinity of pT231 scFv Y31A is approximately  
330 35-fold less than that of pT231 scFv WT, with  $K_D = 60 \pm 19$  nM (**Fig. 5b**).

331 The low affinity variant was cloned into the pBEVY backbone co-expressing GFP (pBEVY-  
332 pT231 scFv Y31A-GFP) and tested in the biopanning platform (**Fig. 5c**). These experiments were  
333 repeated across three different days, with duplicates each day. These experiments showed that a  
334 streptavidin concentration of 1.25  $\mu$ M, which previously appeared to be the concentration at which cell  
335 counts leveled off (**Fig. 4c**), no longer resulted in a significant difference between target wells and control  
336 wells. From these experiments, we see that further increasing the streptavidin concentration to 6.25  $\mu$ M  
337 does result in significant capture of yeast cells based on phospho-specific antibody binding (**Fig. 5c**).  
338 These results indicate that the high streptavidin concentration is necessary when biopanning for low to  
339 moderate affinity antibodies, which are often seen in antibody library screening.

340

## 341 *Discussion*

342           We developed a novel method of yeast biopanning against site-specific protein phosphorylations  
343 and demonstrated its use against the human tau protein. The approach allows discriminating yeast cells  
344 displaying scFvs based on binding to peptides containing a single site-specific phosphorylation. The  
345 primary focus of the biopanning approach was on selective yeast capture based on phospho-site specific  
346 antibody interaction. We have previously demonstrated the capability to enhance the affinity of phospho-  
347 site specific antibodies without sacrificing specificity (D. Li et al., 2018), but clonal selection strategies  
348 based on phospho-specificity is still critically lacking. Here we demonstrated that the biopanning is highly  
349 selective to yeast cells expressing phospho-specific scFvs, and only to peptides that contain the  
350 phosphorylated residue. The bi-directional expression plasmids to display scFvs and intracellularly  
351 express fluorescent protein reporters allowed efficient counting of interacting yeast cells, and in-well  
352 monitoring of non-specific binding. This allowed us to improve biopanning conditions, such as  
353 streptavidin and biotinylation reagent concentration. Finally, we show that scFvs with moderate affinities  
354 ( $K_D = 60$  nM) can be detected, well within the range of antibodies identified from scFv libraries using  
355 yeast display biopanning (Wang et al., 2007; Zorniak et al., 2017).

356           Notably, the streptavidin concentration needed to be increased by 5-fold to capture the yeast cells  
357 displaying the lower affinity scFv mutant (pT231 scFv Y31A) (**Fig. 5c**). In addition to having lower  
358 affinity, the Y31A mutant also showed lower binding signal normalized to expression level (**Fig. 5b**),  
359 indicating that a greater fraction of displayed scFv may not be functional compared to the wild-type scFv.  
360 This will reduce the surface density of available scFvs that interact with the target, which may be why  
361 greater streptavidin concentration was required. Such sub-optimal scFv folding is a likely scenario in  
362 heterologous antibody fragment libraries, and therefore further demonstrates the robustness of the yeast  
363 biopanning method for detecting phospho-site specific interaction.

364           The monolayer of HEK293FT cells on which the biotinylated peptides are immobilized seem  
365 superfluous but our initial attempts to biopan without them were unsuccessful (data not shown). The



366 mammalian cell surface provides a matrix in which proteins are embedded that can be biotinylated. This  
367 complex structure may provide higher avidity interactions that allow yeast cell binding. For library  
368 screening, a negative selection step will be necessary to eliminate antibodies that bind to non-targets,  
369 including the mammalian cell surface antigens, biotin, and streptavidin. Negative selections have been  
370 already demonstrated using yeast biopanning to identify cell-type selective binders (Zorniak et al., 2017).

371         Although we have demonstrated this capability using a single phosphorylation site in tau, we  
372 anticipate this method will be widely applicable to phospho-specific antibody characterization and  
373 screening. Due to the fact that protein phosphorylation sites tend to be located in disordered regions  
374 (Iakoucheva et al., 2004; Nicolaou et al., 2021), synthetic peptides containing phosphorylated residues  
375 have been extremely effective antigens for generating phospho-site specific antibodies suitable for a wide  
376 range of applications, including various cell and tissue labeling, immunoblotting, and immunoassays.  
377 With this new capability to biopan against phospho peptides, identification of monoclonal antibodies will  
378 be greatly aided by rapid characterization of phospho-site specific binding of clones after immunization.  
379 Moreover, screening various existing yeast surface display libraries, including the human scFv (Feldhaus  
380 et al., 2003), camelid nanobodies (McMahon et al., 2018), and other binders (Hackel et al., 2008; Kruziki  
381 et al., 2015) will be possible. Combined with subtractive panning methods to eliminate non-specific  
382 binders, this approach has great potential for identifying phospho-site specific clones. In particular, we  
383 anticipate to identify antibodies against tau phosphorylation sites that need specific antibodies  
384 (Arbaciauskaite et al., 2021).

### 385 ***Conflict of Interest***

386 The authors declare no conflict of interest.

387

### 388 ***Acknowledgements***

389 This work was funded by grants NSF 1706743, NIH 1R21NS111358-01A1, and Alzheimer's Association  
390 2019-AARG-NFT-640971. M.A. was also supported by the GE innovation fellowship.

## 391 **References**

- 392 Arbaciauskaite, M., Lei, Y., & Cho, Y. K. (2021). High-specificity antibodies and detection methods for  
393 quantifying phosphorylated tau from clinical samples. *Antibody Therapeutics*, 4(1), 34–44.  
394 <https://doi.org/10.1093/abt/tbab004>
- 395 Ashton, N. J., Pascoal, T. A., Karikari, T. K., Benedet, A. L., Lantero-Rodriguez, J., Brinkmalm, G.,  
396 Snellman, A., Schöll, M., Troakes, C., Hye, A., Gauthier, S., Vanmechelen, E., Zetterberg, H., Rosa-  
397 Neto, P., & Blennow, K. (2021). Plasma p-tau<sub>231</sub>: a new biomarker for incipient Alzheimer’s  
398 disease pathology. *Acta Neuropathologica*, 141(5), 709–724. [https://doi.org/10.1007/s00401-021-](https://doi.org/10.1007/s00401-021-02275-6)  
399 [02275-6](https://doi.org/10.1007/s00401-021-02275-6)
- 400 Boder, E. T., & Wittrup, K. D. (1997). Yeast Surface Display for Screening Combinatorial Polypeptide  
401 Libraries. *Nature Biotechnology*, 553–557.
- 402 Cohen, P. (2001). The role of protein phosphorylation in human health and disease. The Sir Hans Krebs  
403 Medal Lecture. *European Journal of Biochemistry*, 268(19).
- 404 Dujardin, S., Commins, C., Lathuiliere, A., Beerepoot, P., Fernandes, A. R., Kamath, T. V., De Los  
405 Santos, M. B., Klickstein, N., Corjuc, D. L., Corjuc, B. T., Dooley, P. M., Viode, A., Oakley, D. H.,  
406 Moore, B. D., Mullin, K., Jean-Gilles, D., Clark, R., Atchison, K., Moore, R., ... Hyman, B. T.  
407 (2020). Tau molecular diversity contributes to clinical heterogeneity in Alzheimer’s disease. *Nature*  
408 *Medicine*, 26(8), 1256–1263. <https://doi.org/10.1038/s41591-020-0938-9>
- 409 Ercan, E., Eid, S., Weber, C., Kowalski, A., Bichmann, M., Behrendt, A., Matthes, F., Krauss, S.,  
410 Reinhardt, P., Fulle, S., & Ehrnhoefer, D. E. (2017). A validated antibody panel for the  
411 characterization of tau post-translational modifications. *Molecular Neurodegeneration*, 12(87), 1–  
412 19. <https://doi.org/10.1186/s13024-017-0229-1>
- 413 Feldhaus, M. J., Siegel, R. W., Opresko, L. K., Coleman, J. R., Feldhaus, J. M. W., Yeung, Y. A.,  
414 Cochran, J. R., Heinzelman, P., Colby, D., Swers, J., Graff, C., Wiley, H. S., & Wittrup, K. D.

- 415 (2003). Flow-cytometric isolation of human antibodies from a nonimmune *Saccharomyces*  
416 *cerevisiae* surface display library. *Nature Biotechnology*, *21*(2), 163–170.  
417 <https://doi.org/10.1038/nbt785>
- 418 Graves, J. D., & Krebs, E. G. (1999). Protein Phosphorylation and Signal Transduction. *Pharmacology &*  
419 *Therapeutics*, *82*(2), 111–121. [https://doi.org/https://doi.org/10.1016/S0163-7258\(98\)00056-4](https://doi.org/10.1016/S0163-7258(98)00056-4)
- 420 Hackel, B. J., Kapila, A., & Dane Wittrup, K. (2008). Picomolar Affinity Fibronectin Domains  
421 Engineered Utilizing Loop Length Diversity, Recursive Mutagenesis, and Loop Shuffling. *Journal*  
422 *of Molecular Biology*, *381*(5), 1238–1252. <https://doi.org/10.1016/j.jmb.2008.06.051>
- 423 Huang, D., & Shusta, E. V. (2005). Secretion and Surface Display of Green Fluorescent Protein Using the  
424 Yeast *Saccharomyces cerevisiae*. *Biotechnology Progress*, *21*(2), 349–357.  
425 <https://doi.org/10.1021/bp0497482>
- 426 Iakoucheva, L. M., Radivojac, P., Brown, C. J., O'Connor, T. R., Sikes, J. G., Obradovic, Z., & Dunker,  
427 A. K. (2004). The importance of intrinsic disorder for protein phosphorylation. *Nucleic Acids*  
428 *Research*, *32*(3), 1037–1049. <https://doi.org/10.1093/nar/gkh253>
- 429 Janelidze, S., Mattsson, N., Palmqvist, S., Smith, R., Beach, T. G., Serrano, G. E., Chai, X., Proctor, N.  
430 K., Eichenlaub, U., Zetterberg, H., Blennow, K., Reiman, E. M., Stomrud, E., Dage, J. L., &  
431 Hansson, O. (2020). Plasma P-tau181 in Alzheimer's disease: relationship to other biomarkers,  
432 differential diagnosis, neuropathology and longitudinal progression to Alzheimer's dementia. *Nature*  
433 *Medicine*, *26*(3), 379–386. <https://doi.org/10.1038/s41591-020-0755-1>
- 434 Johnson, L. N., & Lewis, R. J. (2001). Structural Basis for Control by Phosphorylation. *Chemical*  
435 *Reviews*, *101*(8), 2209–2242. <https://doi.org/10.1021/cr000225s>
- 436 Kruziki, M. A., Bhatnagar, S., Woldring, D. R., Duong, V. T., & Hackel, B. J. (2015). A 45-Amino-Acid  
437 Scaffold Mined from the PDB for High-Affinity Ligand Engineering. *Chemistry & Biology*, *22*(7),

- 438 946–956. <https://doi.org/https://doi.org/10.1016/j.chembiol.2015.06.012>
- 439 Li, D., & Cho, Y. K. (2020). High specificity of widely used phospho-tau antibodies validated using a  
440 quantitative whole-cell based assay. *Journal of Neurochemistry*, *152*(1), 122–135.  
441 <https://doi.org/10.1111/jnc.14830>
- 442 Li, D., Wang, L., Maziuk, B. F., Yao, X., Wolozin, B., & Cho, Y. K. (2018). Directed evolution of a  
443 picomolar-affinity, high-specificity antibody targeting phosphorylated tau. *Journal of Biological*  
444 *Chemistry*, *293*(31), 12081–12094. <https://doi.org/10.1074/jbc.RA118.003557>
- 445 Li, Y., Cockburn, W., Kilpatrick, J. B., & Whitelam, G. C. (2000). High Affinity ScFvs from a Single  
446 Rabbit Immunized with Multiple Haptens. *Biochemical and Biophysical Research Communications*,  
447 *268*(2), 398–404. <https://doi.org/10.1006/bbrc.2000.2129>
- 448 Liu, N., Zhao, Z., Tan, Y., Lu, L., Wang, L., Liao, Y., Beloglazova, N., De Saeger, S., Zheng, X., & Wu,  
449 A. (2016). Simultaneous Raising of Rabbit Monoclonal Antibodies to Fluoroquinolones with  
450 Diverse Recognition Functionalities via Single Mixture Immunization. *Analytical Chemistry*, *88*(2),  
451 1246–1252. <https://doi.org/10.1021/acs.analchem.5b03637>
- 452 McMahon, C., Baier, A. S., Pascolutti, R., Wegrecki, M., Zheng, S., Ong, J. X., Erlandson, S. C., Hilger,  
453 D., Rasmussen, S. G. F., Ring, A. M., Manglik, A., & Kruse, A. C. (2018). Yeast surface display  
454 platform for rapid discovery of conformationally selective nanobodies. *Nature Structural &*  
455 *Molecular Biology*, *25*(3), 289–296. <https://doi.org/10.1038/s41594-018-0028-6>
- 456 Miller, C. A., Martinat, M. A., & Hyman, L. E. (1998). Assessment of aryl hydrocarbon receptor complex  
457 interactions using pBEVY plasmids: Expression vectors with bi-directional promoters for use in  
458 *Saccharomyces cerevisiae*. *Nucleic Acids Research*, *26*(15), 3577–3583.  
459 <https://doi.org/10.1093/nar/26.15.3577>
- 460 Nicolaou, S. T., Hebditch, M., Jonathan, O. J., Verma, C. S., & Warwicker, J. (2021). PhosIDP: a web

- 461 tool to visualize the location of phosphorylation sites in disordered regions. *Scientific Reports*,  
462 *11*(1), 9930. <https://doi.org/10.1038/s41598-021-88992-0>
- 463 Pawson, T. (2004). Specificity in Signal Transduction: From Phosphotyrosine-SH2 Domain Interactions  
464 to Complex Cellular Systems. *Cell*, *116*(2), 191–203. [https://doi.org/https://doi.org/10.1016/S0092-](https://doi.org/10.1016/S0092-8674(03)01077-8)  
465 [8674\(03\)01077-8](https://doi.org/10.1016/S0092-8674(03)01077-8)
- 466 Qian, W., Yang, J.-R., Pearson, N. M., Maclean, C., & Zhang, J. (2012). Balanced codon usage optimizes  
467 eukaryotic translational efficiency. *PLoS Genetics*, *8*(3), e1002603–e1002603.  
468 <https://doi.org/10.1371/journal.pgen.1002603>
- 469 Shih, H. H., Tu, C., Cao, W., Klein, A., Ramsey, R., Fennell, B. J., Lambert, M., Ní Shúilleabháin, D.,  
470 Autin, B., Kouranova, E., Laxmanan, S., Braithwaite, S., Wu, L., Ait-Zahra, M., Milici, A. J.,  
471 Dumin, J. A., LaVallie, E. R., Arai, M., Corcoran, C., ... Finlay, W. J. J. (2012). An ultra-specific  
472 avian antibody to phosphorylated tau protein reveals a unique mechanism for phosphoepitope  
473 recognition. *Journal of Biological Chemistry*, *287*(53), 44425–44434.  
474 <https://doi.org/10.1074/jbc.M112.415935>
- 475 Thijssen, E. H., La Joie, R., Wolf, A., Strom, A., Wang, P., Iaccarino, L., Bourakova, V., Cobigo, Y.,  
476 Heuer, H., Spina, S., VandeVrede, L., Chai, X., Proctor, N. K., Airey, D. C., Shcherbinin, S.,  
477 Duggan Evans, C., Sims, J. R., Zetterberg, H., Blennow, K., ... Dickerson, B. C. (2020). Diagnostic  
478 value of plasma phosphorylated tau181 in Alzheimer’s disease and frontotemporal lobar  
479 degeneration. *Nature Medicine*, *26*(3), 387–397. <https://doi.org/10.1038/s41591-020-0762-2>
- 480 Wang, X. X., Cho, Y. K., & Shusta, E. V. (2007). Mining a yeast library for brain endothelial cell-binding  
481 antibodies. *Nature Methods*, *4*(2), 143–145. <https://doi.org/10.1038/nmeth993>
- 482 Wang, X. X., & Shusta, E. V. (2005). The use of scFv-displaying yeast in mammalian cell surface  
483 selections. *Journal of Immunological Methods*, *304*(1–2), 30–42.  
484 <https://doi.org/10.1016/j.jim.2005.05.006>

- 485 Weber, J., Peng, H., & Rader, C. (2017). From rabbit antibody repertoires to rabbit monoclonal  
486 antibodies. *Experimental & Molecular Medicine*, 49(3), e305–e305.  
487 <https://doi.org/10.1038/emm.2017.23>
- 488 Wesseling, H., Mair, W., Kumar, M., Schlaffner, C. N., Tang, S., Beerepoot, P., Fatou, B., Guise, A. J.,  
489 Cheng, L., Takeda, S., Muntel, J., Rotunno, M. S., Dujardin, S., Davies, P., Kosik, K. S., Miller, B.  
490 L., Berretta, S., Hedreen, J. C., Grinberg, L. T., ... Steen, J. A. (2020). Tau PTM Profiles Identify  
491 Patient Heterogeneity and Stages of Alzheimer’s Disease. *Cell*, 1–15.  
492 <https://doi.org/10.1016/j.cell.2020.10.029>
- 493 Zorniak, M., Clark, P. A., Umlauf, B. J., Cho, Y., Shusta, E. V., & Kuo, J. S. (2017). Yeast display  
494 biopanning identifies human antibodies targeting glioblastoma stem-like cells. *Scientific Reports*,  
495 7(1), 1–12. <https://doi.org/10.1038/s41598-017-16066-1>
- 496
- 497

## Fig. 1

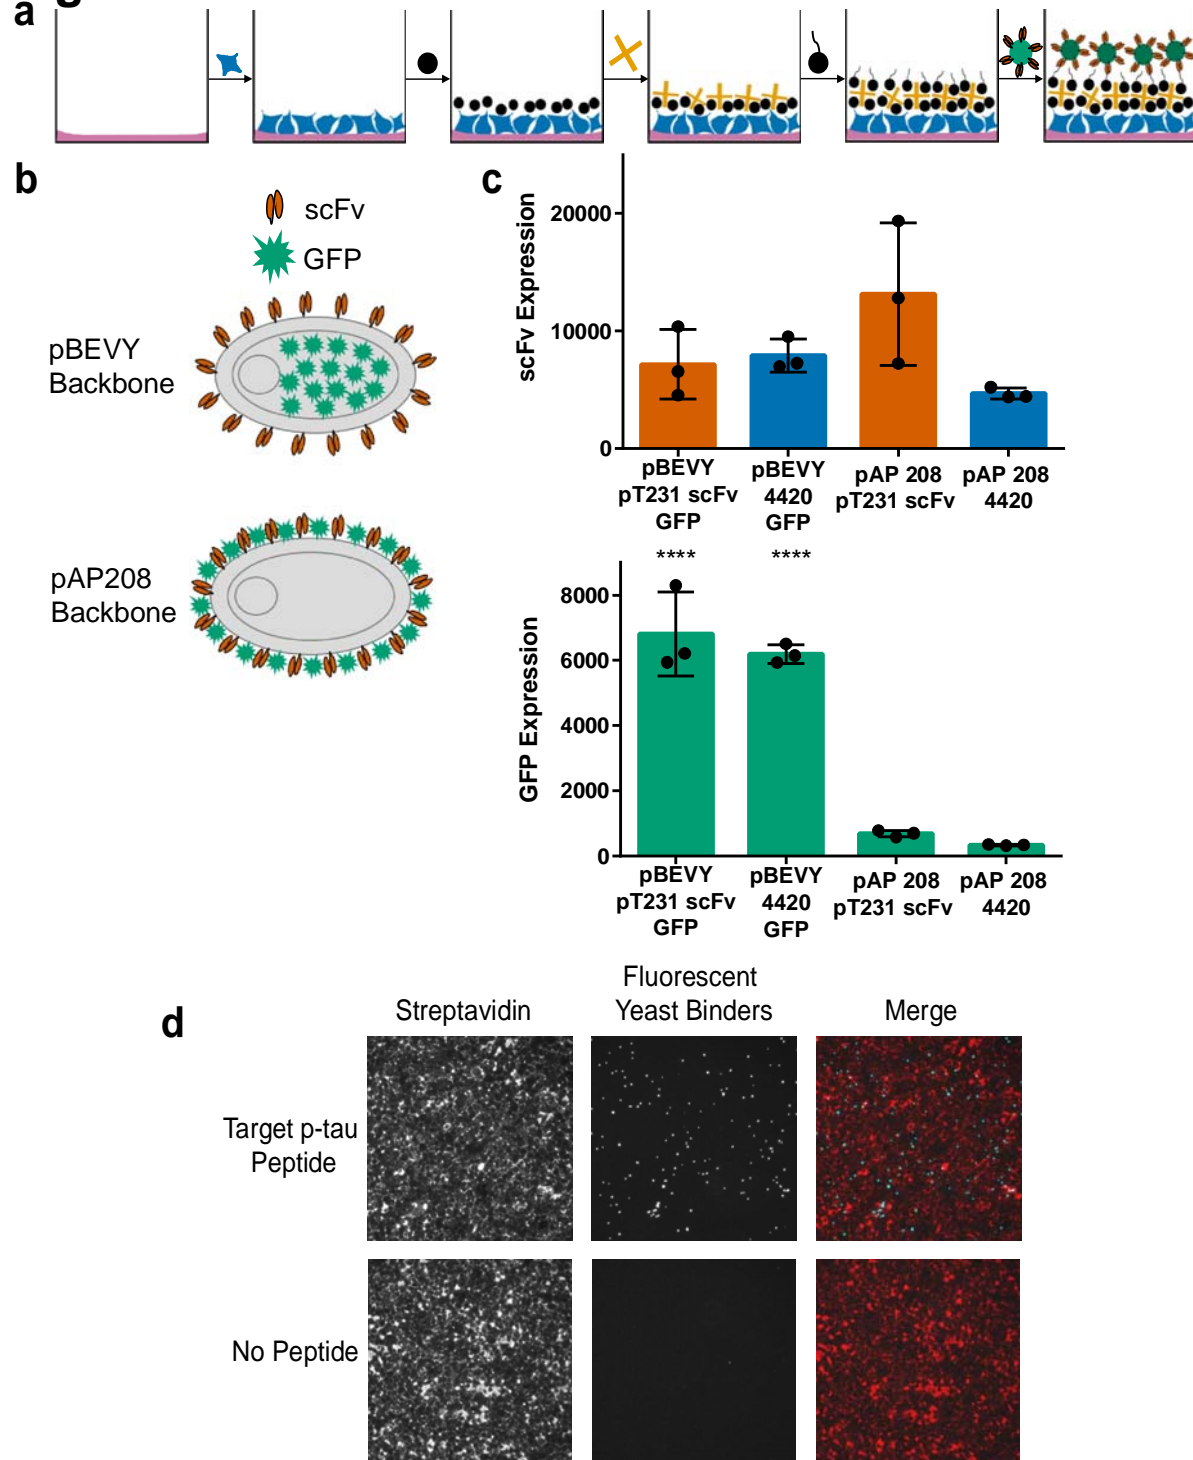

498

499 **Figure 1.** Overview of biopanning method and yeast reagent design. **a**, schematic representation of  
500 biopanning method. Wells are first coated with Matrigel and HEK293FT are seeded. The cell surface is

501 then biotinylated, and streptavidin is added. Biotinylated peptides are then added to the wells to be used  
502 as target antigens. Yeast cells displaying antibody binders and intracellularly expressing fluorescent  
503 protein are added to the wells and used as reporters. **b**, schematic representation of different reporter  
504 designs. The pBEVY backbone expresses antibody fragments (scFv) on the yeast cell surface and  
505 fluorescent protein (GFP) intracellularly. The pAP208 backbone expresses both scFv and GFP on the  
506 yeast cell surface. **c**, comparing expression levels for scFv and GFP. \*\*\*\*  $P \leq 0.0001$  using Tukey's  
507 multiple comparisons test. Otherwise,  $P > 0.05$ . **d**, representative images indicating presence of  
508 streptavidin on HEK293FT cell surface (red) and yeast cells binding to target peptide (cyan).

509



## Fig. 2

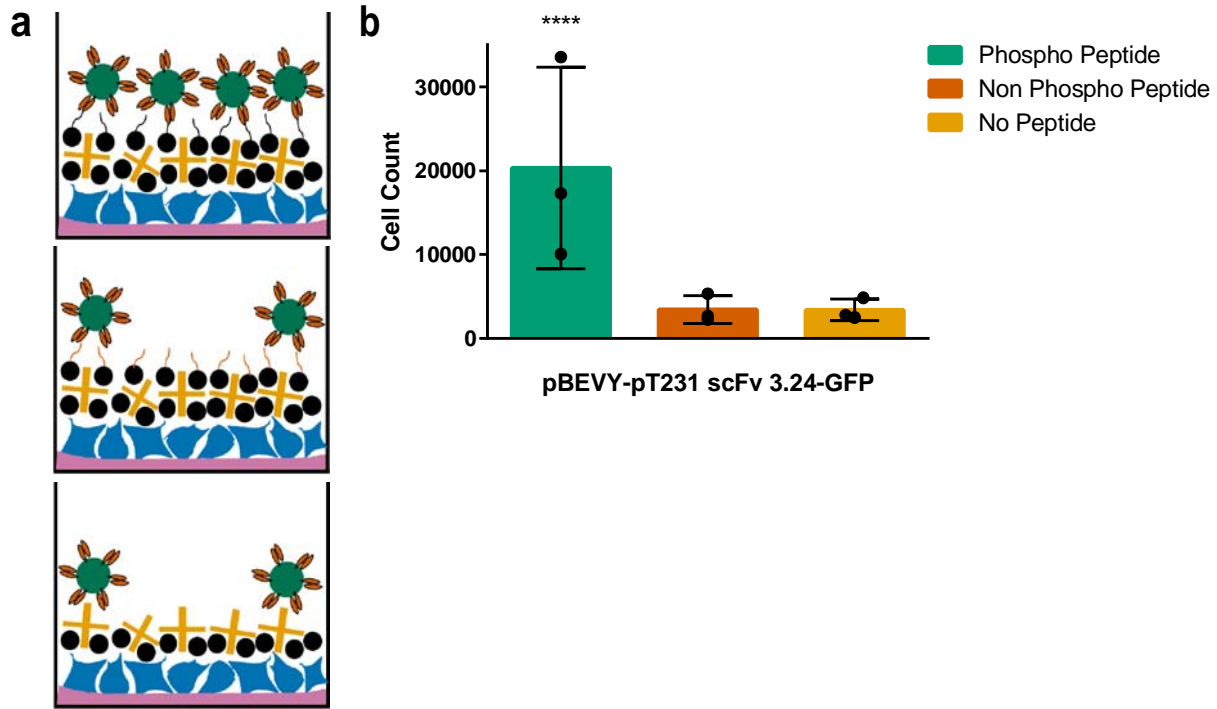

510

511 **Figure 2.** Testing selective binding of the scFv to peptide of interest. **a**, schematic representation showing  
512 different control conditions tested. Wells with target peptide (topmost image) are expected to contain  
513 more yeast cell reporters than wells with non-target peptide (middle image) and wells without peptide  
514 (bottom image). **b**, quantification of yeast cells expressing pT231 scFv 3.24 and GFP present in wells  
515 after washing. \*\*\*\*  $P \leq 0.0001$  using two-way ANOVA. Otherwise,  $P > 0.05$ .

516

### Fig. 3

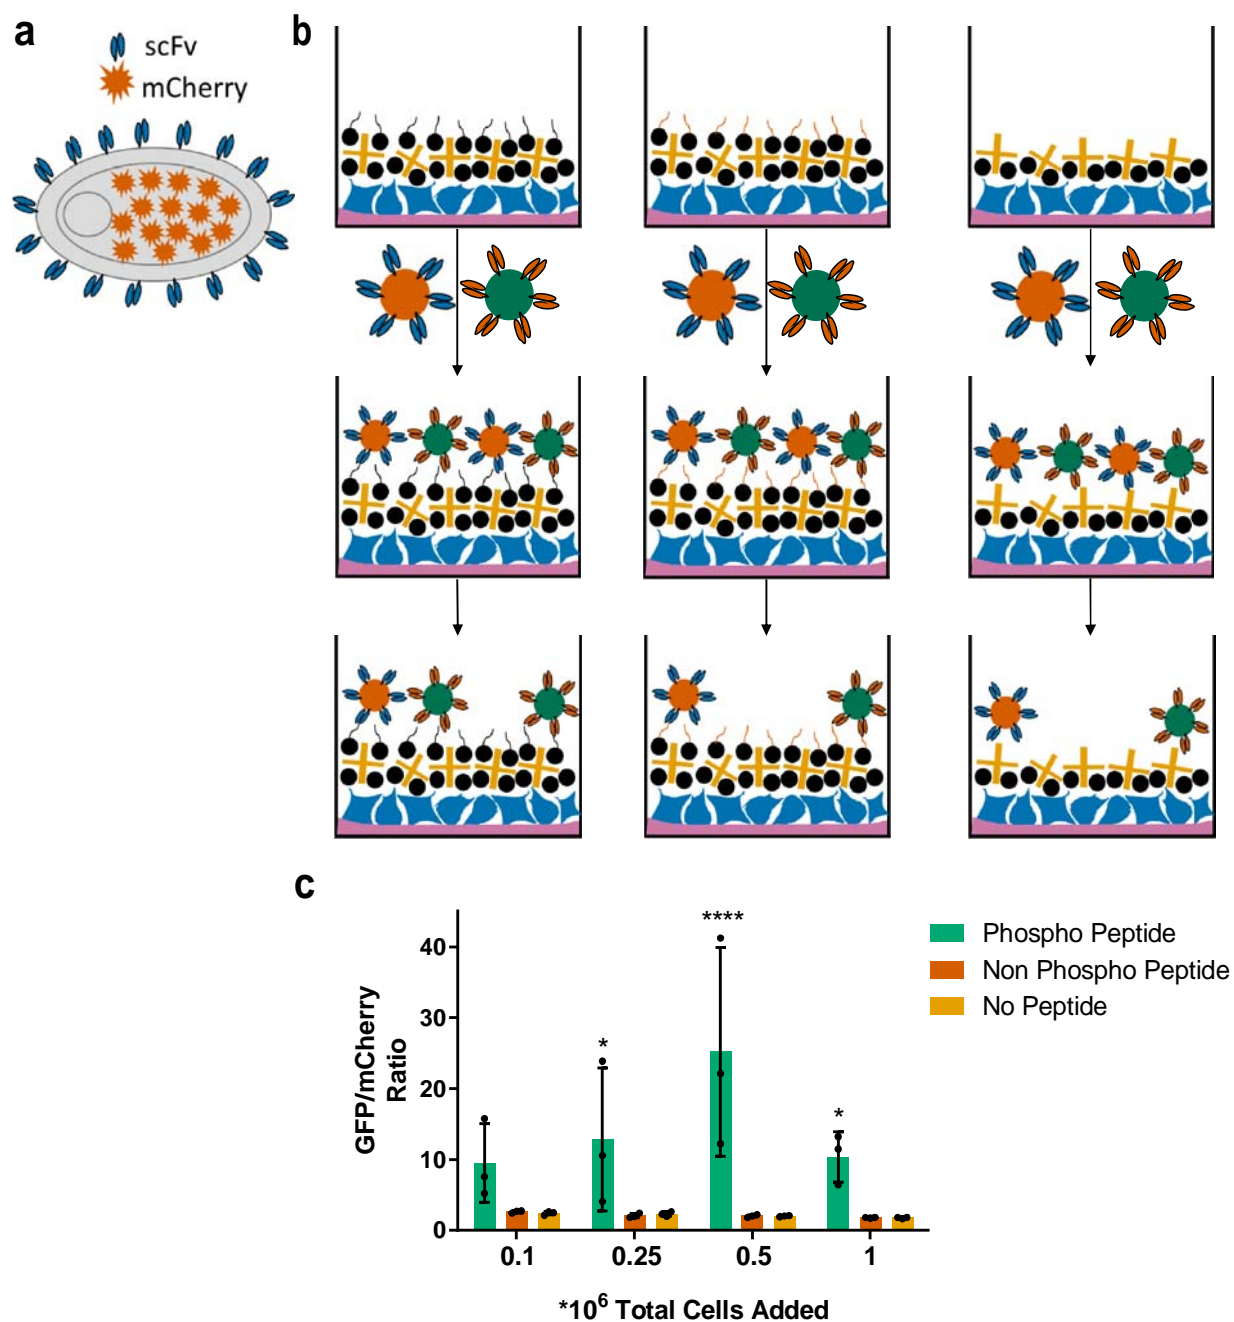

517

518 **Figure 3.** Design and application of internal control yeast cell reporters. **a**, schematic representation of  
519 control yeast cell design. Yeast cells display a control scFv on their surface and intracellularly express a  
520 fluorescent protein (mCherry). **b**, schematic representation of biopanning method with control yeast cells  
521 included. Yeast cells expressing pBEVY-4420-mCherry and pBEVY-pT231 scFv 3.24-GFP are mixed in  
522 equal ratio and added to wells containing phospho peptide (left), non-phospho peptide (middle), and no  
523 peptide (right). **c**, quantification of the ratio of yeast cells expressing pBEVY-pT231 scFv 3.24-GFP to  
524 yeast cells expressing pBEVY-4420-mCherry present in wells after washing. \*  $P \leq 0.05$ , \*\*\*\*  $P \leq 0.0001$   
525 using Tukey's multiple comparisons test. Otherwise,  $P > 0.05$ .

## Fig. 4

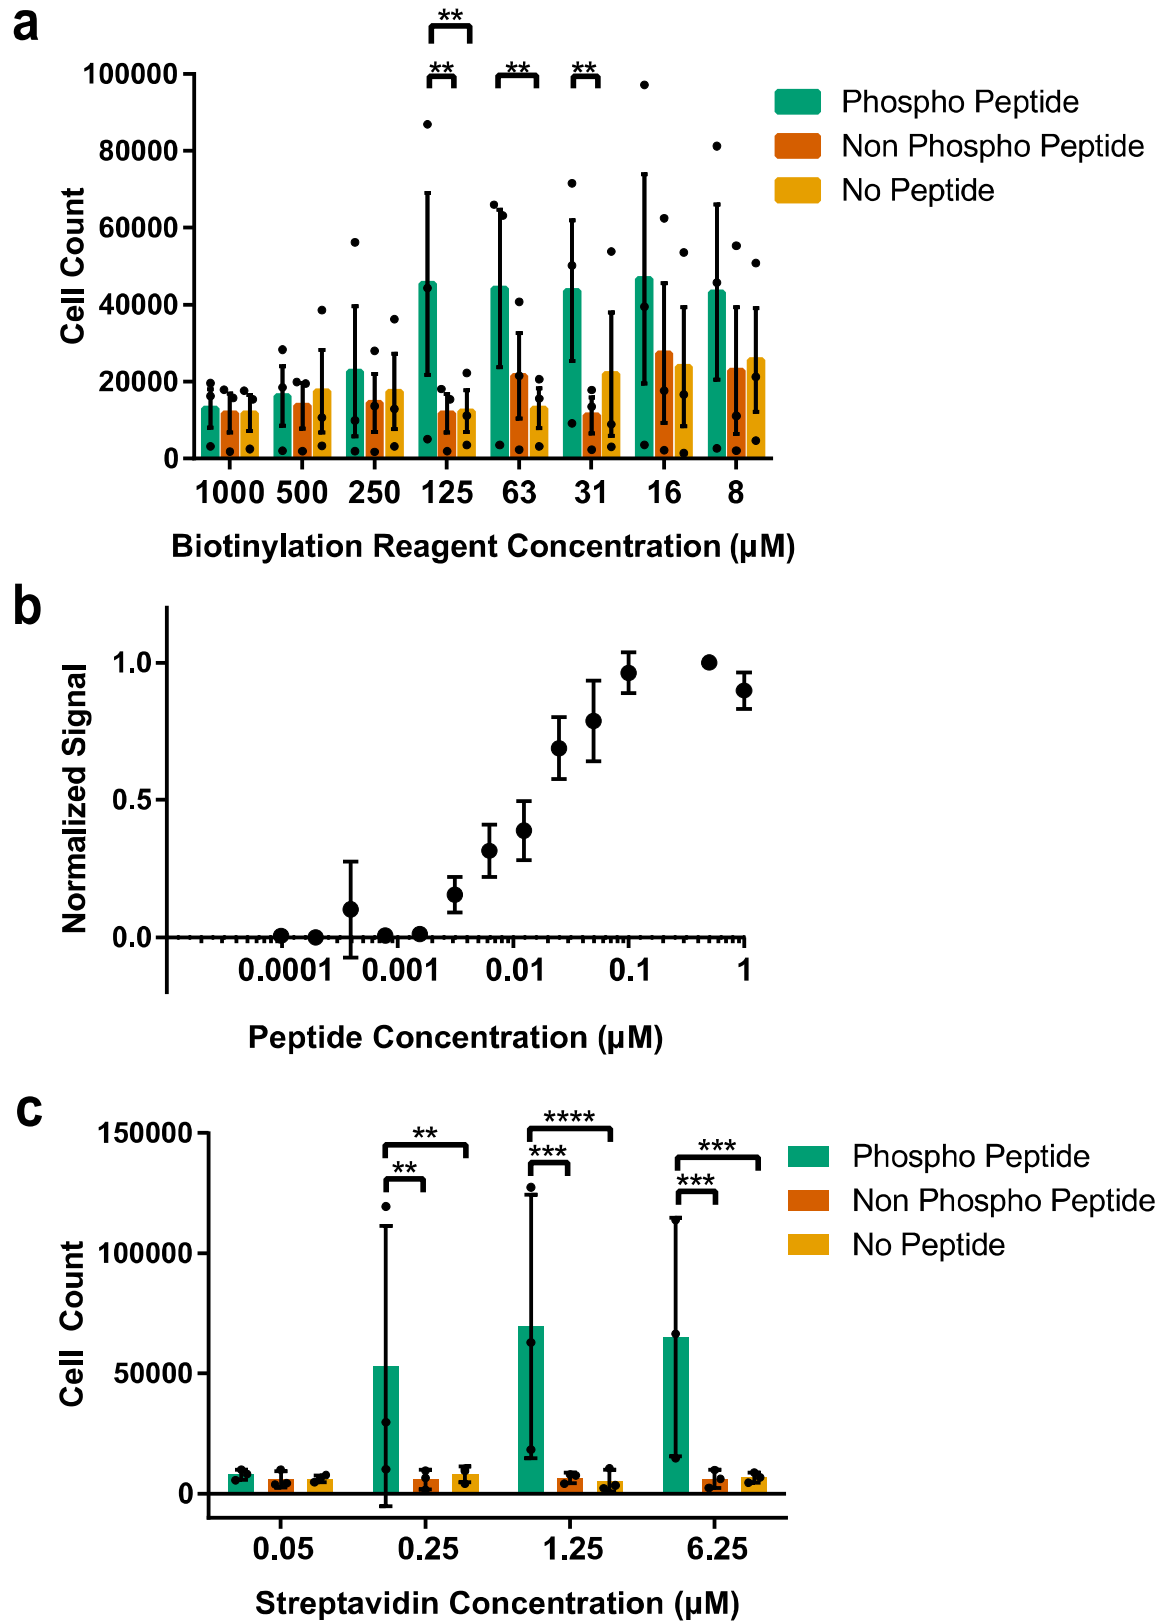

527 **Figure 4.** Improving biopanning parameters. **a**, quantification of number of yeast cells expressing  
528 pBEVY-pT231 scFv 3.24-GFP present in wells when tested across different biotin concentrations. **b**,  
529 normalized “signal” [(# yeast cells, phospho-peptide wells)-(# yeast cells, no peptide wells)]/(# yeast  
530 cells, highest concentration of peptide) for a range of peptide concentrations. **c**, number of yeast cells  
531 present in wells when tested across different streptavidin concentrations. \*\*  $P \leq 0.01$ , \*\*\*  $P \leq 0.001$ ,  
532 \*\*\*\*  $P \leq 0.0001$  using Tukey’s multiple comparisons test. Otherwise,  $P > 0.05$ .

533

## Fig. 5

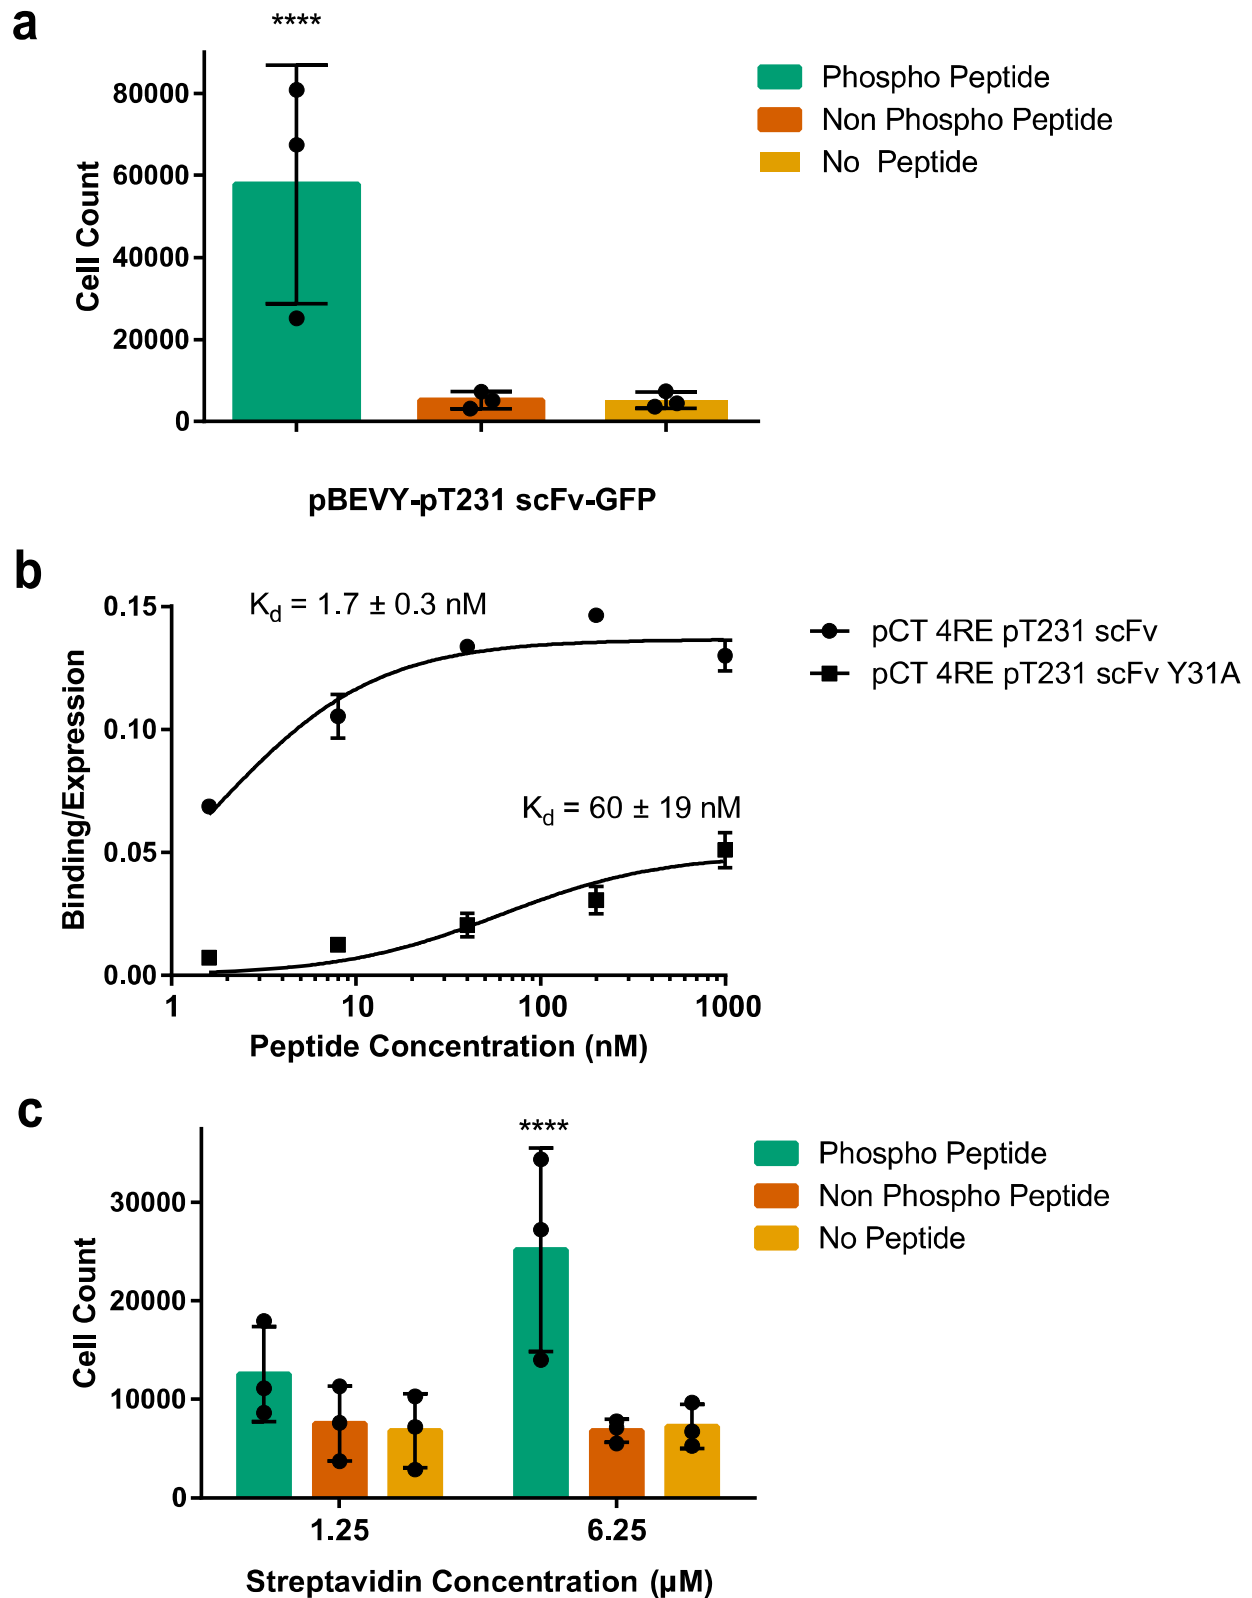

535 **Figure 5.** Testing selective binding for lower affinity scFvs to peptide of interest after optimizing  
536 parameters. **a**, quantification of number of yeast cells expressing pBEVY-pT231 scFv-GFP present in  
537 wells with a biotin concentration of 125  $\mu$ M, a peptide concentration of 0.1  $\mu$ M, and a streptavidin  
538 concentration of 1.25  $\mu$ M. **b**, binding/expression curve for wild-type scFv (pCT-4RE-pT231 scFv) and  
539 lower affinity mutant (pCT-4RE-pT231 scFv Y25A) measured using flow cytometry. **c**, quantification of  
540 yeast cells expressing pBEVY-pT231 scFv Y25A-GFP present in wells after washing. \*\*\*\*  $P \leq 0.0001$   
541 using Tukey's multiple comparisons test. Otherwise,  $P > 0.05$ .
